# Supplementary material for: In situ insertion of copper to form heteroanionic D3h-symmetric [Cu3Mo8O32]10− for a templated Ag55 nanocluster
Source: Royal Society of Chemistry journal article supplement (doi:10.1039/d2nr00078d), 2022-01-01
Supplement: d2nr00078d1.pdf [file d2nr00078d1.pdf]

Electronic Supplementary Information

***In situ* insertion of copper to form  $D_{3h}$  symmetric  $[\text{Cu}_3\text{Mo}_8\text{O}_{32}]^{10-}$  heteroanion for templated  $\text{Ag}_{55}$  Nanocluster**

Jin-Ping Gao,<sup>a</sup> Zhikai Qi,<sup>a</sup> Fu-Qiang Zhang,<sup>a</sup> and Xian-Ming Zhang<sup>\*a,b</sup>

<sup>a</sup>Key Laboratory of Magnetic Molecules and Magnetic Information Materials (Ministry of Education), Institute of Chemistry and Culture, School of Chemistry & Material Science, Shanxi Normal University, Taiyuan 030006, P. R. China.

E-mail: zhangxm@sxnu.edu.cn.

<sup>b</sup>Key Laboratory of Interface Science and Engineering in Advanced Material (Ministry of Education), College of Chemistry & Chemical Engineering, Taiyuan University of Technology, Taiyuan, 030024, P. R. China.

## Content

**Scheme S1.** Synthetic route to Ag<sub>55</sub>Cu<sub>3</sub> clusters.

**Table S1.** Crystal data and structure refinement for **1**.

**Table S2.** Selected bond lengths [Å] and angles [°] for **1**.

**Table S3.** Bond Valence Sum (BVS) calculations for compounds **1** of [Cu<sub>3</sub>Mo<sub>8</sub>O<sub>32</sub>]<sup>10-</sup>.

**Table S4.** The structures and coordination modes of molybdate anion templates in silver clusters in the literature and this work.

**Fig. S1** FT-IR spectra of **1**.

**Fig. S2** Energy dispersive spectroscopy (EDS) mapping results on an SEM image of single particle of **1**. Scale bar is 6 μm.

**Fig. S3.** UV-vis diffuse spectra of **1**.

## 1. Experimental section

### 1.1 Synthesis of $[(\text{Cu}_3(\text{Mo}_4\text{O}_{16})_2@_{\text{Ag}}55(\text{CyhS})_{43}(\text{CH}_3\text{O})(\text{COOCF}_3)] \cdot 3\text{H}_2\text{O}$ (**1**)

$(\text{CyhSAg})_n$  was prepared by reacting equivalent amounts of  $\text{AgNO}_3$  and  $\text{CyhSH}$  in the presence of  $\text{Et}_3\text{N}$ . The mixture of  $(\text{CyhSAg})_n$  (0.0011 g, 0.05 mmol) and  $\text{Cu}(\text{COOCF}_3)_2$  (0.0060g, 0.025mmol) were dissolved in methanol and *N,N*-Dimethylformamide (7:1, 4 mL) under stirring. Half an hour later, copper powder (0.0030g, 0.025mmol) was added to the above solution. Finally,  $\text{Na}_2\text{MoO}_4$  (0.001 g, 0.006 mmol) was the mixed solution after three hours. The reaction mixture was sealed and heated at  $65^\circ\text{C}$  for 20 hours (**Scheme S1**). Then, the solution crystallizes slowly when placed at room temperature after 5-7 days. Yellow-green octahedral block crystal of **1** was crystallized in the yields of 30%.

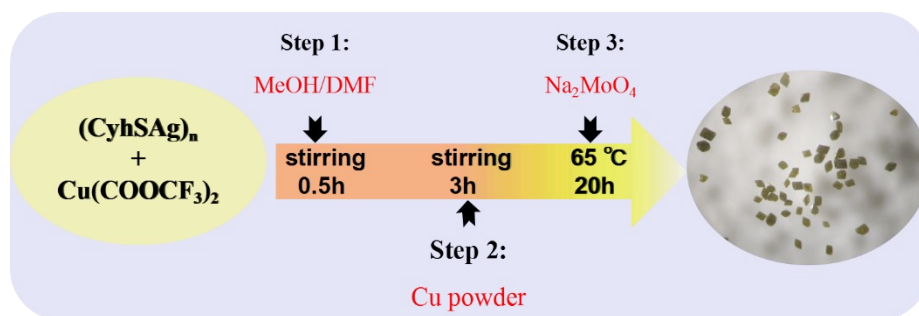

**Scheme S1.** Synthetic route to  $\text{Ag}_{55}\text{S}_{43}$  clusters.

The suitable solvent system ( $\text{CH}_3\text{OH}/\text{DMF}$ ) ( $\text{DMF}$  = dimethylformamide) and copper salt are very important. The central Cu atom in **1** is in a +2 oxidation state, which cannot be provided directly from common copper (II) salts such as  $\text{Cu}(\text{OAc})_2$ ,  $(\text{CF}_3\text{SO}_3)_2\text{Cu}$ ,  $\text{CuCl}_2$ , or  $\text{Cu}(\text{NO}_3)_2$  with Cu powder. Here, the copper powder has no effect on reducing the divalent copper, and the divalent copper is directly inserted into the intermediate connection position *in situ*.

**1.2 Crystallographic studies.** Single crystal of **1** with appropriate dimensions was chosen under an optical microscope and quickly coated with high vacuum grease (Dow Corning Corporation) to prevent decomposition. Crystal was mounted on CryoLoop™ loop and the cell parameter and intensity data were recorded on a Rigaku Oxford Diffraction XtaLAB Synergy-S diffractometer equipped with a HyPix-6000HE Hybrid Photon Counting (HPC) detector operating in shutterless mode and an Oxford Cryosystems Cryostream 800 Plus at 150 K using  $\text{Cu K}\alpha$  ( $\lambda = 1.54184 \text{ \AA}$ ) for **1** from PhotonJet micro-focus X-ray Source. Data were processed using the CrystAlisPro software suite. Absorption corrections were applied

by using the program CrysAlisPro (multi-scan).<sup>S1</sup> Crystal structure was examined using the Addsym subroutine of PLATON to ensure that no additional symmetry could be applied to the models. The structure was solved with direct methods and refined using Full-matrix least-squares based on  $F^2$  with program SHELXL-97 within OLEX2.<sup>S2</sup> Due to the disorder of cyclohexanethiol in the outshell of the cluster some atoms were refined isotropically. The heavy residue peaks are in immediate proximity to silver atoms were split. Appropriate restraints or constraints orders were applied to the atoms in the cluster. Crystallographic data and structure refinements of **1** are summarized in Table S1, and the selected bond distances and angles are listed in Table S2.

**1.3 Physical measurements.** UV-Vis absorption spectra were recorded on TU-1950 UV-Vis spectrophotometer at room temperature. The corresponding optical band gap was evaluated as a function of the Kubelka-Munk equation:  $\alpha/S = (1-R)^2/2R$ . Fourier-transform infrared (FTIR) spectra were obtained on a FTIR spectrophotometer (Thermo Nicolet 360). The X-ray photoelectron spectrum (XPS) spectra were obtained by the Thermo scientific K-Alpha<sup>+</sup> XPS with a monochromatic Al K $\alpha$  X-ray source (1486.6 eV) operating at 72W (12kV, 6mA). Binding energies were referred to the C 1s peak of adventitious carbon at 284.8 eV. EDS-Mapping was obtained by JSM-7500F. The photocurrent test was carried out on a CHI660E electrochemistry workstation. 5 mg samples of **1** and naphthol (5 wt. %, 10  $\mu$ L) were dispersed in 80  $\mu$ L ethanol, this system is mixed for half an hour under ultrasound. Then mixed solution was transferred by pipette tips dropped on the cleaned ITO glass. The coated film was obtained after evaporation under room temperature. The prepared ITO glass film was used as working electrode, a Pt sheet as the counter electrode, and an Ag/AgCl electrode as the reference electrode. 0.2 M Na<sub>2</sub>SO<sub>4</sub> aqueous was used as the medium.

## 2. Supporting tables

**Table S1.** Crystal data and structure refinement for **1**.

| Compound                                                                            | <b>1</b>                                       |
|-------------------------------------------------------------------------------------|------------------------------------------------|
| Empirical formula                                                                   | $C_{261}H_{476}Ag_{55}Cu_3F_3Mo_8O_{38}S_{43}$ |
| Formula weight                                                                      | 12548.96                                       |
| Temperature                                                                         | 150.00 (11)                                    |
| Crystal system                                                                      | triclinic                                      |
| Space group                                                                         | <i>P</i> -1                                    |
| <i>a</i> (Å)                                                                        | 23.3674(3)                                     |
| <i>b</i> (Å)                                                                        | 23.7497(4)                                     |
| <i>c</i> (Å)                                                                        | 38.3998(5)                                     |
| $\alpha$ (°)                                                                        | 73.3300(10)                                    |
| $\beta$ (°)                                                                         | 75.2360(10)                                    |
| $\gamma$ (°)                                                                        | 73.6330(10)                                    |
| <i>V</i> (Å <sup>3</sup> )                                                          | 19233.6(5)                                     |
| <i>Z</i>                                                                            | 2                                              |
| $\rho_{\text{calc}}$ (g cm <sup>-3</sup> )                                          | 2.162                                          |
| $\mu$ (mm <sup>-1</sup> )                                                           | 26.673                                         |
| <i>F</i> (000)                                                                      | 12138.0                                        |
| Size (mm)                                                                           | 0.15 × 0.08 × 0.07                             |
| Reflections                                                                         | 214510                                         |
| Data / parameters                                                                   | 80132/2588                                     |
| $R_1^a$ , $wR_2^b$ [ <i>I</i> > 2σ( <i>I</i> )]                                     | 0.1023/0.2827                                  |
| $R_1^a$ , $wR_2^b$ (all data)                                                       | 0.1428/0.3083                                  |
| $\Delta\rho_{\text{max}}/\Delta\rho_{\text{min}}$ (e <sup>+</sup> Å <sup>-3</sup> ) | 3.27/-3.98                                     |

$$^aR_1 = \sum||F_0| - |F_c|| / \sum|F_0|. \quad ^b wR_2 = [\sum w(F_0^2 - F_c^2)^2 / \sum w(F_0^2)^2]^{1/2}$$

**Table S2.** Selected bond lengths [Å] and angles [°] for **1**.

| <b>1</b>             |           |           |           |
|----------------------|-----------|-----------|-----------|
| Ag1-S1               | 2.683(6)  | Ag34-S31  | 2.519(5)  |
| Ag1-S3               | 2.472(7)  | Ag34-O20  | 2.323(9)  |
| Ag1-S4               | 2.644(6)  | Ag35-Ag34 | 3.024(2)  |
| Ag1-O38 <sup>1</sup> | 2.524(19) | Ag35-S20  | 2.755(7)  |
| Ag2-S1               | 2.707(7)  | Ag35-S21  | 2.460(5)  |
| Ag2-S4               | 2.658(6)  | Ag35-S30  | 2.501(5)  |
| Ag2-S5               | 2.505(7)  | Ag35-O17  | 2.560(10) |
| Ag3-Ag5              | 3.330(2)  | Ag36-Ag35 | 3.022(2)  |
| Ag3-Ag13             | 3.251(2)  | Ag36-Ag21 | 3.298(2)  |
| Ag3-Ag4              | 3.140(3)  | Ag36-S21  | 2.517(6)  |
| Ag3-Ag2              | 3.085(2)  | Ag36-S22  | 2.787(5)  |
| Ag3-S1               | 2.409(6)  | Ag36-S31  | 2.514(5)  |
| Ag3-S6               | 2.415(6)  | Ag36-O18  | 2.416(9)  |
| Ag4-Ag1              | 3.070(3)  | Ag37-S31  | 2.417(6)  |
| Ag4-Ag8              | 3.239(3)  | Ag37-S32  | 2.418(6)  |
| Ag4-Ag6              | 3.234(3)  | Ag38-S32  | 2.489(5)  |
| Ag4-S1               | 2.403(7)  | Ag39-S23  | 2.444(4)  |
| Ag4-S2               | 2.408(9)  | Ag39-S33  | 2.431(4)  |
| Ag5-Ag6              | 3.370(3)  | Ag39-Ag38 | 3.151(7)  |
| Ag5-S6               | 2.428(5)  | Ag40-O26  | 2.510(10) |
| Ag5-S7               | 2.412(5)  | Ag40-S34  | 2.435(4)  |
| Ag6-S2               | 2.423(9)  | Ag41-S33  | 2.455(4)  |
| Ag6-S7               | 2.445(7)  | Ag41-S34  | 2.621(5)  |
| Ag6-O3               | 2.592(12) | Ag42-S34  | 2.478(4)  |
| Ag7-Ag8              | 3.153(2)  | Ag42-S35  | 2.443(5)  |
| Ag7-Ag6              | 3.250(2)  | Ag44-S27  | 2.508(5)  |
| Ag7-S9               | 2.562(5)  | Ag44-O27  | 2.342(9)  |
| Ag7-S8               | 2.467(4)  | Ag44-Ag45 | 3.245(3)  |
| Ag7-O4               | 2.341(9)  | Ag46-Ag34 | 3.374(2)  |
| Ag7-Ag17             | 3.161(2)  | Ag46-S38  | 2.511(7)  |
| Ag8-S3               | 2.517(7)  | Ag46-S30  | 2.783(6)  |
| Ag8-S2               | 2.715(7)  | Ag46-S37  | 2.416(6)  |
| Ag8-S9               | 2.541(6)  | Ag46-Ag33 | 3.366(8)  |
| Ag8-O2               | 2.509(13) | Ag46-Ag45 | 3.227(4)  |
| Ag9-Ag19             | 3.170(2)  | Ag48-S32  | 2.610(5)  |
| Ag9-Ag8              | 3.072(3)  | Ag49-Ag46 | 3.122(3)  |
| Ag9-S3               | 2.406(6)  | Ag49-Ag47 | 3.289(3)  |
| Ag9-S11              | 2.912(6)  | Ag49-S38  | 2.383(7)  |
| Ag9-S10              | 2.398(6)  | Ag49-S41  | 2.382(6)  |
| Ag10-Ag9             | 3.157(2)  | Ag49-O31  | 2.576(11) |
| Ag10-Ag1             | 3.229(2)  | Ag51-Ag52 | 2.961(4)  |
| Ag10-S4              | 2.524(5)  | Ag51-S35  | 2.371(6)  |
| Ag10-S11             | 2.445(5)  | Ag51-S43  | 2.395(8)  |
| Ag10-O2              | 2.367(11) | Ag52-S42  | 2.322(15) |
| Ag11-Ag10            | 2.922(2)  | Ag52-S43  | 2.344(12) |
| Ag11-S4              | 2.491(5)  | Ag52-Ag5  | 3.131(3)  |
| Ag11-S12             | 2.502(4)  | Ag53-S41  | 2.546(7)  |
| Ag11-O1              | 2.413(12) | Ag54-S39  | 2.397(7)  |
| Ag12-Ag13            | 3.310(2)  | Ag54-O30  | 2.457(12) |
| Ag12-S5              | 2.429(6)  | Ag54-S40  | 2.418(6)  |
| Ag12-S12             | 2.735(4)  | Ag54-S40  | 2.408(9)  |

|           |           |           |           |
|-----------|-----------|-----------|-----------|
| Ag12-S13  | 2.472(5)  | Ag54-O30  | 2.490(14) |
| Ag12-Ag23 | 2.812(11) | Ag55-S20  | 2.355(10) |
| Ag13-S5   | 2.505(6)  | Ag55-S19  | 2.347(8)  |
| Ag13-S14  | 2.546(6)  | Ag55-Ag32 | 3.320(5)  |
| Ag13-S6   | 2.677(5)  | Ag55-Ag20 | 3.083(3)  |
| Ag13-O1   | 2.501(13) | Mo1-O2    | 1.737(11) |
| Ag13-Ag23 | 3.18(3)   | Mo1-O3    | 1.745(11) |
| Ag14-Ag25 | 3.142(2)  | Mo1O1     | 1.784(11) |
| Ag14-Ag13 | 3.223(2)  | Mo1-O6    | 2.170(9)  |
| Ag14-S14  | 2.502(6)  | Mo1-O5    | 2.170(9)  |
| Ag14-S15  | 2.440(4)  | Mo1-O4    | 2.149(9)  |
| Ag14-O5   | 2.318(9)  | Mo2-O6    | 2.101(10) |
| Ag14-Ag24 | 2.912(16) | Mo2-O7    | 1.706(9)  |
| Ag15-S15  | 2.361(4)  | Mo2-O15   | 1.819(10) |
| Ag15-S16  | 2.389(6)  | Mo2-O12   | 2.241(9)  |
| Ag16-Ag15 | 2.845(2)  | Mo2-O10   | 1.813(10) |
| Ag16-S7   | 2.749(5)  | Mo2-O4    | 2.104(9)  |
| Ag16-S16  | 2.398(6)  | Mo3-O5    | 2.106(9)  |
| Ag16-S8   | 2.462(5)  | Mo3-O12   | 2.271(9)  |
| Ag17-S8   | 2.466(5)  | Mo3-O11   | 1.812(11) |
| Ag17-S17  | 2.634(5)  | Mo3-O8    | 1.709(10) |
| Ag18-Ag7  | 2.940(2)  | Mo3-O9    | 1.803(9)  |
| Ag18-S9   | 2.478(5)  | Mo3-O4    | 2.118(9)  |
| Ag18-S18  | 2.448(5)  | Mo4-O6    | 2.064(11) |
| Ag18-O10  | 2.487(10) | Mo4-O5    | 2.099(9)  |
| Ag18-Ag17 | 2.971(2)  | Mo4-O12   | 2.213(8)  |
| Ag18-Ag31 | 3.208(5)  | Mo4-O14   | 1.816(9)  |
| Ag19-Ag55 | 3.140(3)  | Mo4-O13   | 1.795(10) |
| Ag19-S10  | 2.421(6)  | Mo4-O16   | 1.732(10) |
| Ag19-S9   | 2.639(6)  | Mo5-O24   | 1.819(10) |
| Ag19-S19  | 2.658(6)  | Mo5-O17   | 1.788(9)  |
| Ag20-S11  | 2.306(6)  | Mo5-O23   | 2.288(9)  |
| Ag21-S12  | 2.509(4)  | Mo5-O27   | 2.101(9)  |
| Ag21-S22  | 2.477(5)  | Mo5-O29   | 1.712(9)  |
| Ag21-O14  | 2.474(9)  | Mo5-O20   | 2.071(10) |
| Ag21-Ag22 | 3.004(4)  | Mo6-O25   | 1.822(10) |
| Ag22-S13  | 2.460(5)  | Mo6-O26   | 1.799(10) |
| Ag23-S13  | 2.565(14) | Mo6-O23   | 2.228(8)  |
| Ag23-S14  | 2.224(19) | Mo6-O28   | 1.705(10) |
| Ag24-S14  | 2.390(8)  | Mo6-O27   | 2.122(9)  |
| Ag25-Ag15 | 3.275(3)  | Mo6-O21   | 2.080(9)  |
| Ag25-S24  | 2.532(6)  | Mo7-O18   | 1.818(9)  |
| Ag25-S25  | 2.692(5)  | Mo7-O22   | 1.806(10) |
| Ag25-O11  | 2.462(10) | Mo7-O23   | 2.226(9)  |
| Ag25-Ag24 | 3.307(15) | Mo7-O20   | 2.123(9)  |
| Ag25-Ag26 | 2.856(13) | Mo7-O19   | 1.708(10) |
| Ag26-S34  | 2.762(13) | Mo7-O21   | 2.091(8)  |
| Ag26-O26  | 2.556(16) | Mo8-O27   | 2.134(10) |
| Ag27-Ag15 | 3.210(2)  | Mo8-O20   | 2.190(8)  |
| Ag27-S25  | 2.384(5)  | Mo8-O21   | 2.218(9)  |
| Ag27-S17  | 2.349(5)  | Mo8-O31   | 1.766(11) |
| Ag27-Ag3A | 2.876(15) | Mo8O30    | 1.761(12) |
| Ag27-Ag26 | 3.063(13) | Mo8-O32   | 1.760(11) |
| Ag28-Ag27 | 3.034(2)  | Cu1-O15   | 1.947(10) |

---

|           |           |         |           |
|-----------|-----------|---------|-----------|
| Ag28-S25  | 2.463(5)  | Cu1-O14 | 1.919(9)  |
| Ag28-S26  | 2.415(6)  | Cu1-O17 | 1.935(9)  |
| Ag28-S34  | 2.676(5)  | Cu1-O18 | 1.933(10) |
| Ag28-Ag29 | 3.239(2)  | Cu2-O13 | 1.946(9)  |
| Ag28-Ag26 | 2.249(14) | Cu2-O11 | 1.944(10) |
| Ag29-S26  | 2.357(6)  | Cu2-O22 | 1.941(10) |
| Ag29-S27  | 2.437(5)  | Cu2-O26 | 1.959(10) |
| Ag30-S27  | 2.404(5)  | Cu3-O9  | 1.936(10) |
| Ag31-S28  | 2.512(7)  | Cu3-O25 | 1.923(10) |
| Ag31-S19  | 2.627(11) | Cu3-O24 | 1.929(11) |
| Ag32-S29  | 2.372(8)  | Cu3-O10 | 1.938(10) |
| Ag32-S28  | 2.407(7)  |         |           |
| Ag33-S30  | 2.285(6)  |         |           |
| Ag34-S30  | 2.501(5)  |         |           |

---



**Table S3.** Bond Valence Sum (BVS) calculations for compounds **1** of  $[\text{Cu}_3\text{Mo}_8\text{O}_{32}]^{10-}$ .

| Bond    | D     | BVS            | Bond    | D     | BVS            | Bond    | D     | BVS            |
|---------|-------|----------------|---------|-------|----------------|---------|-------|----------------|
| Mo1 O2  | 1.737 | 1.58445        | Mo2 O6  | 2.101 | 0.59218        | Mo3 O5  | 2.106 | 0.58420        |
| Mo1 O3  | 1.745 | 1.54915        | Mo2 O7  | 1.706 | 1.72377        | Mo3 O12 | 2.272 | 0.37316        |
| Mo1 O1  | 1.784 | 1.39429        | Mo2 O15 | 1.817 | 1.27406        | Mo3 O11 | 1.811 | 1.29504        |
| Mo1 O6  | 2.170 | 0.49196        | Mo2 O12 | 2.240 | 0.40637        | Mo3 O8  | 1.708 | 1.71017        |
| Mo1 O5  | 2.171 | 0.48958        | Mo2 O10 | 1.815 | 1.28387        | Mo3 O9  | 1.803 | 1.32546        |
| Mo1 O4  | 2.149 | 0.52058        | Mo2 O4  | 2.103 | 0.58899        | Mo3 O4  | 2.117 | 0.56643        |
|         |       | <b>6.03004</b> |         |       | <b>5.86926</b> |         |       | <b>5.85448</b> |
| Mo4 O6  | 2.064 | 0.65294        | Mo5 O24 | 1.819 | 1.26596        | Mo6 O25 | 1.823 | 1.25541        |
| Mo4 O5  | 2.100 | 0.59330        | Mo5 O17 | 1.788 | 1.37760        | Mo6 O26 | 1.800 | 1.33424        |
| Mo4 O12 | 2.213 | 0.43687        | Mo5 O23 | 2.288 | 0.35664        | Mo6 O23 | 2.228 | 0.41971        |
| Mo4 O14 | 1.815 | 1.28072        | Mo5 O27 | 2.100 | 0.59361        | Mo6 O28 | 1.707 | 1.71554        |
| Mo4 O13 | 1.796 | 1.35046        | Mo5 O29 | 1.711 | 1.69885        | Mo6 O27 | 2.123 | 0.55761        |
| Mo4 O16 | 1.732 | 1.60622        | Mo5 O20 | 2.072 | 0.64054        | Mo6 O21 | 2.081 | 0.62471        |
|         |       | <b>5.92053</b> |         |       | <b>5.93322</b> |         |       | <b>5.90726</b> |
| Mo7 O18 | 1.818 | 1.27005        | Mo8 O27 | 2.133 | 0.54305        |         |       |                |
| Mo7 O22 | 1.805 | 1.31617        | Mo8 O20 | 2.190 | 0.46547        |         |       |                |
| Mo7 O23 | 2.225 | 0.42345        | Mo8 O21 | 2.218 | 0.43123        |         |       |                |
| Mo7 O20 | 2.122 | 0.55868        | Mo8 O31 | 1.767 | 1.45879        |         |       |                |
| Mo7 O19 | 1.709 | 1.70832        | Mo8 O30 | 1.760 | 1.48878        |         |       |                |
| Mo7 O21 | 2.090 | 0.60972        | Mo8 O32 | 1.759 | 1.48996        |         |       |                |
|         |       | <b>5.88640</b> |         |       | <b>5.87731</b> |         |       |                |
| Cu1 O15 | 1.946 | 0.48557        | Cu2 O13 | 1.946 | 0.48641        | Cu3 O9  | 1.938 | 0.49703        |
| Cu1 O14 | 1.919 | 0.52317        | Cu2 O11 | 1.943 | 0.48936        | Cu3 O25 | 1.925 | 0.51500        |
| Cu1 O17 | 1.934 | 0.50144        | Cu2 O22 | 1.940 | 0.49353        | Cu3 O24 | 1.930 | 0.50759        |
| Cu1 O18 | 1.934 | 0.50226        | Cu2 O26 | 1.957 | 0.47112        | Cu3 O10 | 1.938 | 0.49630        |
|         |       | <b>2.00356</b> |         |       | <b>1.94043</b> |         |       | <b>2.01539</b> |

**Table S4.** The structures and coordination modes of molybdate anion templates in silver clusters in the literature and this work.

| Slilver cluster                                                                                                                                                                                                                 | Molybdate anion templates                                                                                                                                                 | Number of Ag | negative charges | Ref.             |
|---------------------------------------------------------------------------------------------------------------------------------------------------------------------------------------------------------------------------------|---------------------------------------------------------------------------------------------------------------------------------------------------------------------------|--------------|------------------|------------------|
| $[\text{Ag}_{42}\{\text{Ho}(\text{W}_5\text{O}_{18})_2\}(\text{t-BuC}\equiv\text{C})_{28}\text{Cl}_4]\text{OH}$                                                                                                                 | <br>$[\text{Ho}(\text{W}_5\text{O}_{18})_2]^{9-}$                                        | 42           | 9                | S3               |
| $[(\text{EuW}_{10}\text{O}_{36})_2@ \text{Ag}_{72}(\text{tBuC}\equiv\text{C})_{48}\text{Cl}_2 \cdot 4\text{BF}_4]$                                                                                                              | (e) <br>$[\text{EuW}_{10}\text{O}_{36}]^{9-}$                                            | 72           | 9                | S4               |
| $[\text{Ag}_{64}(\text{C}\equiv\text{C}^t\text{Bu})_{38}(\text{CF}_3\text{COO})_8(\text{Mn}^{\text{III}}\text{Mn}^{\text{IV}}_2\text{Mo}_{14}\text{O}_{56})](\text{OH}) \cdot 10\text{CH}_3\text{CN} \cdot 2\text{H}_2\text{O}$ | <br>$[\text{Mn}^{\text{III}}\text{Mn}^{\text{IV}}_2\text{Mo}_{14}\text{O}_{56}]^{17-}$ | 42           | 17               | S5               |
| $[(\text{Cu}_3(\text{Mo}_4\text{O}_{16})_2@ \text{Ag}_{55}(\text{CyhS})_{43}(\text{CH}_3\text{O})(\text{COOCF}_3)] \cdot 3\text{H}_2\text{O}$                                                                                   | <br>$[\text{Cu}_3(\text{Mo}_4\text{O}_{16})]^{10-}$                                    | 55           | 10               | <b>This work</b> |

### 3. Supporting figures

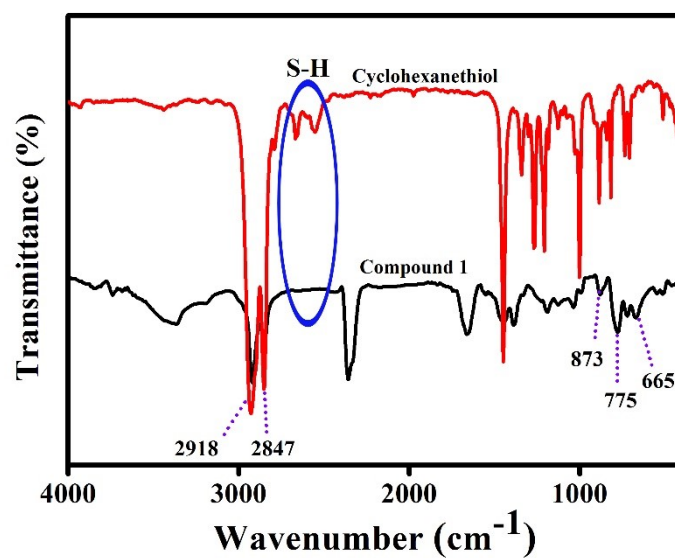

Fig. S1 FT-IR spectra of 1.

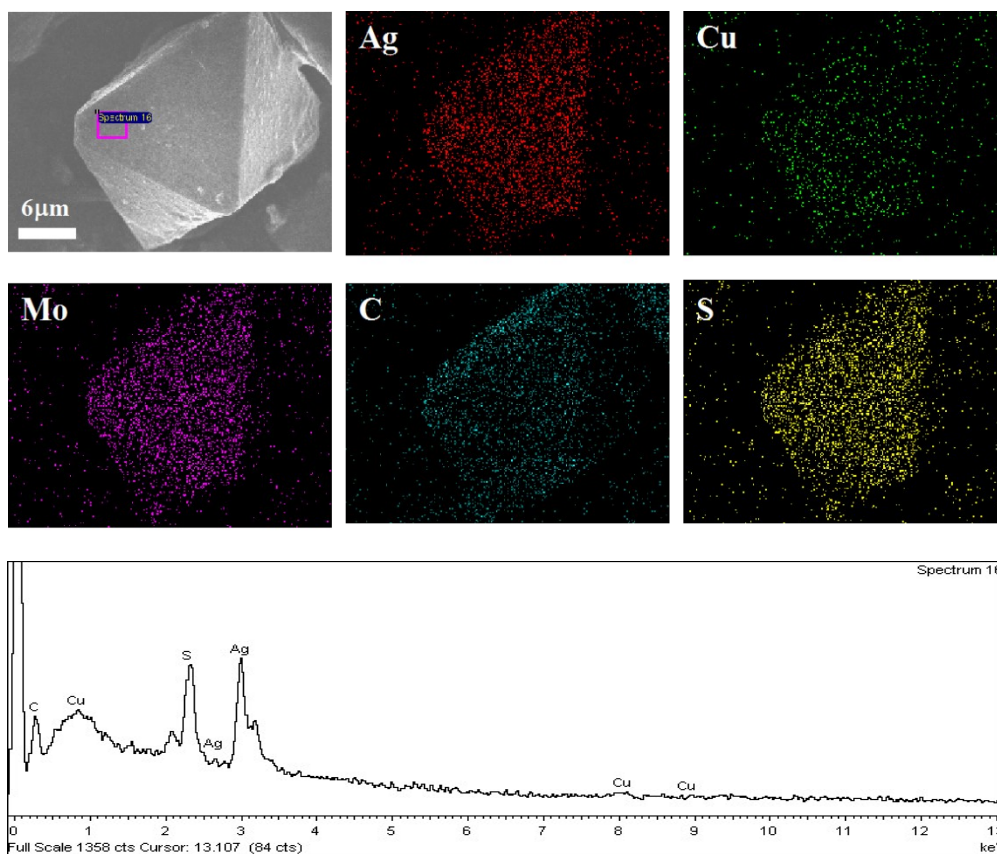

Fig. S2 Energy dispersive spectroscopy (EDS) mapping results on an SEM image of single particle of 1. The scale bar is 6  $\mu\text{m}$ .

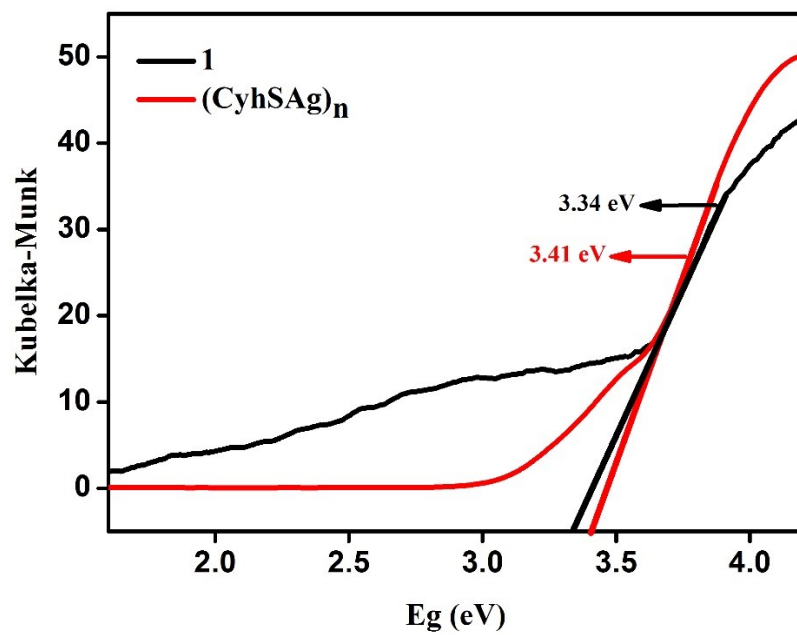

Fig S3. UV-vis diffuse spectra of 1.

#### 4. Supporting references

- S1. (a) Rigaku Oxford Diffraction. CrysAlisPro Software system, version 1.171.40.68a, Rigaku Corporation: Oxford, UK, 2018; (b) Rigaku Oxford Diffraction. CrysAlisPro Software system, version 171.40.19a, Rigaku Corporation: Oxford, UK, 2018.
- S2. Palatinus, L.; Chapuis, G. J. *Appl. Crystallogr.* 2007, 40, 786. Dolomanov, O. V.; Bourhis, L. J.; Gildea, R. J.; Howard, J. A. K.; Puschmann, H. *J Appl. Crystallogr.* 2009, 42, 339.
- S3. Y.-Y. Li, F. Gao, J. E. Beves, Y.-Z. Li and J.-L. Zuo, *Chem. Commun.*, 2013, **49**, 3658-3660.
- S4. S.-S. Zhang, H.-F. Su, Z. Wang, X.-P. Wang, W.-X. Chen, Q.-Q. Zhao, C.-H. Tung, D. Sun and L.-S. Zheng, *Chem. Eur. J.*, 2018, **24**, 1998-2003.
- S5. J.-Y. Wang, K.-G. Liu, Z.-J. Guan, Z.-A. Nan, Y.-M. Lin and Q.-M. Wang, *Inorg. Chem.*, 2016, **55**, 6833-6835.
